# Supplementary material for: Effectiveness of eHealth Interventions and Information Needs in Palliative Care: A Systematic Literature Review
Source: PubMed Central journal article supplement (PMC3961802; doi:10.2196/jmir.2812), 2014-03-07
Supplement: jmir_v16i3e72_app1.pdf [file jmir_v16i3e72_app1.pdf]

| <b>TITLE</b>                                                                                                                                                    | <b>key</b> | <b>Notes</b>                                                              |
|-----------------------------------------------------------------------------------------------------------------------------------------------------------------|------------|---------------------------------------------------------------------------|
| Patient self-reporting in palliative care using information technology: Yes, there is hope!                                                                     | [1]        | Editorial                                                                 |
| Pain and palliative care pharmacotherapy literature summaries and analyses                                                                                      | [2]        | collection of literature summaries                                        |
| Daily life as an Australian medical oncologist                                                                                                                  | [3]        | not specifically on palliative care                                       |
| Outpatient palliative care: Does it matter?                                                                                                                     | [4]        | conference abstract                                                       |
| Future planning to upgrade the pediatric oncology service in the Baghdad children welfare teaching hospital                                                     | [5]        | Pediatric                                                                 |
| Annual convention: Paramedics and emergency doctors of air rescue service met in Wurzburg                                                                       | [6]        | no ehealth intervention and no users' needs                               |
| Triangulation analysis of tele-palliative care implementation in a rural community area in Japan                                                                | [7]        | no ehealth intervention, no users' needs                                  |
| Factors associated with attrition from a randomized controlled trial of meaning-centered group psychotherapy for patients with advanced cancer                  | [8]        | treatment evaluation (psychotherapy)                                      |
| [The palliative care day hospital mobile team]                                                                                                                  | [9]        | French                                                                    |
| [Supporting caregivers in the palliative care unit (interview by Severine Coste)]                                                                               | [10]       | French                                                                    |
| Palliative care intervention for choice and use of opioids in the last hours of life                                                                            | [11]       | no ehealth intervention and no users' needs                               |
| Effects of a palliative care intervention on clinical outcomes in patients with advanced cancer: The project ENABLE II randomized controlled trial              | [12]       | no ehealth intervention and no information needs                          |
| Nursing diagnoses recorded in palliative care documentation. A systematic review                                                                                | [13]       | review on nursing diagnoses related to palliative care                    |
| Adopting and introducing new technology to improve patient care: a wedding of clinicians and informatics specialists                                            | [14]       | no eHealth                                                                |
| The use of modelling to evaluate new drugs for patients with a chronic condition: The case of antibodies against tumour necrosis factor in rheumatoid arthritis | [15]       | report on cancer treatment, not palliative care itself                    |
| Online courses for nurses working in palliative care                                                                                                            | [16]       | report on nursing education, not palliative care as such, no users' needs |
| The veterans health administration system of care for mild traumatic brain injury: Costs, benefits, and controversies                                           | [17]       | report on Polytrauma System of Care, not palliative care itself           |
| Paediatric palliative home care with Internet-based video-phones: lessons learnt                                                                                | [18]       | pediatric                                                                 |
| Using videotelephony to support paediatric oncology-related palliative care in the home: from abandoned RCT to acceptability study                              | [19]       | pediatric                                                                 |

|                                                                                                                                               |      |                                                                                |
|-----------------------------------------------------------------------------------------------------------------------------------------------|------|--------------------------------------------------------------------------------|
| Improving access to palliative care through an innovative quality improvement initiative: An opportunity for pay-for-performance              | [20] | paper on how to increase access to palliative care, no ehealth or users' needs |
| [The helping relationship. Collaboration between the nurses of a palliative care mobile unit and the nurses of the clinical services]         | [21] | French                                                                         |
| [Specific missions for the mobile palliative care support teams]                                                                              | [22] | French                                                                         |
| A rapid response veteran affairs outpatient palliative care consult team (316-B)                                                              | [23] | conference abstract                                                            |
| Vaginal and pelvic recurrences in stage I and II endometrial carcinoma - Survival and prognostic factors                                      | [24] | report on prognostic factors in cancer                                         |
| Radiotherapy and chemotherapy in patients with primary invasive vaginal carcinoma                                                             | [25] | treatment report                                                               |
| Renewing primary care: Lessons learned from the Spanish health care system                                                                    | [26] | vision paper on health system development, no individuals' information needs   |
| Oncology's transitional generation: Charting the way to integrated, efficient, and cost-effective delivery systems                            | [27] | Commentary                                                                     |
| [Development of palliative care in the Vaud canton. 3 mobile teams are in place]                                                              | [28] | French                                                                         |
| Home telemedicine for paediatric palliative care                                                                                              | [29] | Pediatric                                                                      |
| Studying the effectiveness of palliative care [1]                                                                                             | [30] | Letter                                                                         |
| A framework for measuring quality in the emergency department                                                                                 | [31] | Commentary                                                                     |
| Introducing 'Palcall': an innovative out-of-hours telephone service led by hospice nurses.                                                    | [32] | Neither user needs nor efficacy                                                |
| Translating research into practice: Reducing gastrostomy tube placement in advanced dementia patients (711)                                   | [33] | conference abstract                                                            |
| A pediatric oncology nursing outreach program                                                                                                 | [34] | Pediatric                                                                      |
| The role of radiofrequency ablation in the treatment of primary and metastatic tumours of the liver: Initial lessons learned                  | [35] | no palliative care as such                                                     |
| Development of terminology subsets using ICNP(registered trademark)                                                                           | [36] | not on palliative care as such but on nursing terminology                      |
| [Activities of a nurse of a palliative mobile unit]                                                                                           | [37] | French                                                                         |
| Single-ventricle palliation for high-risk neonates: Examining the feasibility of an automated home monitoring system after stage I palliation | [38] | pediatric, no palliative care                                                  |

|                                                                                                                                                               |      |                                               |
|---------------------------------------------------------------------------------------------------------------------------------------------------------------|------|-----------------------------------------------|
| Transitions in care during a palliative care program: Distribution and associated factors                                                                     | [39] | no ehealth, no users' needs                   |
| [Palliative care by a mobile team: objectives and missions, qualities and difficulties]                                                                       | [40] | French                                        |
| Patients at highest risk for venous thromboembolism are not receiving specific discharge instructions warning for signs and symptoms of VTE: A double setback | [41] | conference abstract                           |
| Palliative treatment of esophageal carcinoma                                                                                                                  | [42] | treatment report, not palliative care         |
| Effectiveness of a geriatric palliative care consult on pain management and advance directives among older adults                                             | [43] | conference abstract                           |
| Making an impact on 30 day heart failure readmissions: A comprehensive and collaborative effort begins                                                        | [44] | conference abstract                           |
| The feasibility of telephone follow-up led by a radiation therapist: Experience in a multidisciplinary bone metastases clinic                                 | [45] | synchronous communication, no palliative care |
| Colorectal stenting in large bowel obstruction: Our experience                                                                                                | [46] | conference abstract                           |
| Ontario pharmacists practicing in family health teams and the patient-centered medical home                                                                   | [47] | no palliative care as such                    |
| Bridging the distance: a prospective tele-oncology study in Northern Norway                                                                                   | [48] | No palliative care                            |
| The impact of a modular HIV/AIDS palliative care education programme in rural Uganda                                                                          | [49] | no ehealth, no users' needs                   |
| Study protocol: Optimization of complex palliative care at home via telemedicine. A cluster randomized controlled trial                                       | [50] | synchronous communication, no users' needs    |
| [Mobile team of palliative care. Role of the nurse in relation to hospital nurses]                                                                            | [51] | French                                        |
| Organizing palliative care for rural populations: A systematic review of the evidence                                                                         | [52] | no ehealth intervention, no users'needs       |
| Patients' perceptions of services and preferences for care in amyotrophic lateral sclerosis: A review                                                         | [53] | no ehealth intervention, no users' needs      |
| Ambulatory oncology consulting team: A bridge between the oncology department and staff in the community health care in the county of Stockholm, Sweden       | [54] | no eHealth                                    |
| Journal of Medical Imaging and Radiation Sciences: Message from the Editor                                                                                    | [55] | Editorial                                     |
| Recognition and management of acute medication poisoning                                                                                                      | [56] | no palliative care as such                    |
| [Lois or the end of life of a child suffering from cancer]                                                                                                    | [57] | French                                        |

|                                                                                                                                                                       |      |                                                             |
|-----------------------------------------------------------------------------------------------------------------------------------------------------------------------|------|-------------------------------------------------------------|
| Amoxicillin for acute rhinosinusitis: A randomized controlled trial                                                                                                   | [58] | Medication trial                                            |
| [Mobile palliative and supportive care unit]                                                                                                                          | [59] | French                                                      |
| Stora luckor i journaler vid vard i livets slutskede                                                                                                                  | [60] | article in Swedish                                          |
| Thyroid cancer: possible role of telemedicine                                                                                                                         | [61] | synchronous communication, no palliative care               |
| Patients' opinion of weekend cover by palliative care general practitioners                                                                                           | [62] | report on care organisation during weekends                 |
| Why, How, What, and nullSo What!null developing clinical informatics tools for determined skeptics                                                                    | [63] | conference abstract                                         |
| A narrative literature review of the evidence regarding the economic impact of avoidable hospitalizations amongst palliative care patients in the UK                  | [64] | no ehealth intervention, no users' needs                    |
| Specialty services for children with special health care needs: Supplement not supplant the medical home                                                              | [65] | pediatric                                                   |
| Which cancer patients are referred to hospital at home for palliative care?                                                                                           | [66] | study on treatment decisions, no users' needs               |
| In this issue                                                                                                                                                         | [67] | Editorial                                                   |
| Supportive care assessment: Patient preferences for disclosure of palliative care information                                                                         | [68] | conference abstract                                         |
| Out-of-hours prescribing: A survey of current practice in the UK                                                                                                      | [69] | report on prescription practice, not palliative care itself |
| Preliminary analysis of midlevel practitioners on pain and health-related quality of life and function for a palliative care service at a comprehensive cancer center | [70] | letter to the editor                                        |
| Hospices' Preparation and Practices for Quality Measurement                                                                                                           | [71] | no ehealth intervention, study on quality of care           |
| Technical data evaluation of a palliative care web-based documentation system                                                                                         | [72] | technical evaluation, no efficacy, no users' needs          |
| Analysis of the suitability of 'video-visits' for palliative home care: implications for practice                                                                     | [73] | synchronous communication, no users' needs                  |
| Informatics-enabled behavioral medicine in oncology                                                                                                                   | [74] | no palliative care as such                                  |
| Improving medication reconciliation in an outpatient palliative medicine clinic: A quality improvement study                                                          | [75] | study on medication discrepancies                           |
| Expert consensus on diagnostic criteria and tertiary service requirements for bronchiectasis                                                                          | [76] | treatment evaluation                                        |
| A history of patient education by health professionals in Europe and North America: from authority to shared decision making education                                | [77] | Historic overview, no original research                     |

|                                                                                                                                 |      |                                                                               |
|---------------------------------------------------------------------------------------------------------------------------------|------|-------------------------------------------------------------------------------|
| Knowledge and Attitude toward Hospice Palliative Care among Community-Dwelling Aged Taiwanese-Analysis of Related Factors       | [78] | no ehealth intervention, no users'needs                                       |
| Surgical palliative care in Haiti                                                                                               | [79] | no ehealth intervention or information needs                                  |
| Videotelephony: An innovative mode of palliative care service delivery in regional and remote areas                             | [80] | Pediatric                                                                     |
| Heart failure management programmes in Europe                                                                                   | [81] | study on heart failure management, not palliative care                        |
| Using the internet to improve the study and management of pain: Could the health system meet our expectations?                  | [82] | report on pain management, not palliative care as such                        |
| An approach for incorporating advanced care planning into heart failure specialty care                                          | [83] | conference abstract                                                           |
| Pelvic reirradiation for recurrent or new primary gynecologic malignancies                                                      | [84] | conference abstract                                                           |
| UK telehealth initiatives in palliative care: A review                                                                          | [85] | synchronous communication, no users' needs                                    |
| Using technology in palliative care - A reality                                                                                 | [86] | conference abstract                                                           |
| Use of Norethindrone Acetate Alone for Postoperative Suppression of Endometriosis Symptoms                                      | [87] | pediatric                                                                     |
| From skype to smart phones: Uses and limits of telehealth in palliative care                                                    | [88] | Conference abstract                                                           |
| Empowering local people to run a mobile palliative care service                                                                 | [89] | no research report                                                            |
| Who says medical education hasn't changed?                                                                                      | [90] | video file                                                                    |
| e-Health in pediatric palliative care                                                                                           | [91] | Pediatric                                                                     |
| Information seeking behaviors of parents whose children have life-threatening illnesses                                         | [92] | Pediatric                                                                     |
| Does evidence-based medicine really reduce costs?                                                                               | [93] | not on palliative care as such                                                |
| Spiritual issues in palliative care consultations in the Netherlands                                                            | [94] | report on spiritual issues, not an ehealth intervention or information needs. |
| Videophones for the delivery of home healthcare in oncology                                                                     | [95] | synchronous video-telephony, no users' needs                                  |
| [Palliative care mobile team at a Parisian university hospital]                                                                 | [96] | French                                                                        |
| [What is expected of psychologists in palliative care mobile teams? Their role and missions]                                    | [97] | French                                                                        |
| Comparison of uncovered stent with covered stent for treatment of malignant colorectal obstruction{A figure is presented}       | [98] | treatment evaluation, no palliative care                                      |
| Poor Effect of Family Practice Physician Training at the Organizational Level in Long-Term Care Facilities in Flanders, Belgium | [99] | letter to the editor                                                          |

|                                                                                                                                     |       |                                                        |
|-------------------------------------------------------------------------------------------------------------------------------------|-------|--------------------------------------------------------|
| Communicating with children and families: From everyday interactions to skill in conveying distressing information                  | [100] | Pediatric                                              |
| Feasibility of symptom and quality-of-life (QOL) assessment in a VA network-based palliative care (PC) program                      | [101] | conference abstract                                    |
| Out-of-hours palliative care advice line                                                                                            | [102] | letter to the editor                                   |
| Use of radiation treatment units in breast cancer. Changes in the last 15 years                                                     | [103] | overview article on radio therapy, not palliative care |
| Is it reliable to use cellular phones for symptom assessment in palliative care? Report on a study in patients with advanced cancer | [104] | letter to the editor                                   |
| Using telehealth technology to support CME in end-of-life care for community physicians in Ontario                                  | [105] | no ehealth intervention, no users' needs               |
| Pediatric palliative care and eHealth: Opportunities for patient-centered care                                                      | [106] | Pediatric                                              |
| Analytic review: Mass-casualty incidents: How does an ICU prepare?                                                                  | [107] | No palliative care                                     |
| Telemedicine is crucial for improving access to specialist renal care and management of renal disease in remote/rural locations     | [108] | no palliative care                                     |
| Validation study of an end-of-life questionnaire from the Swedish Register of Palliative Care                                       | [109] | no ehealth intervention, no users' needs               |
| The radiologist as a palliative care subspecialist: Providing symptom relief when cure is not possible                              | [110] | no ehealth intervention, no users' needs               |
| International collaborations in cancer control and the Third International Cancer Control Congress                                  | [111] | report on cancer control in general                    |
| New developments in the detection and treatment of depression in cancer settings                                                    | [112] | report on depression with cancer patients              |
| Use of ISDN video-phones for clients receiving palliative and antenatal home care                                                   | [113] | synchronous video-telephony                            |
| Home videoconferencing for patients with severe congenital heart disease following discharge                                        | [114] | Pediatric                                              |
| Psychosocial supportive care: An effective and integrated team approach                                                             | [115] | no ehealth intervention, no users' information needs   |
| Using electronic triggers to identify patients at risk for diagnostic delays in prostate cancer                                     | [116] | no palliative care                                     |
| Telemedicine in radiation oncology: Challenges and opportunities                                                                    | [117] | synchronous communication                              |
| Palliative chemotherapy during the last month of life                                                                               | [118] | no ehealth intervention, no users' needs               |
| Entering our fourth decade                                                                                                          | [119] | Pediatric                                              |

|                                                                                                                                                                                                                     |       |                                                                       |
|---------------------------------------------------------------------------------------------------------------------------------------------------------------------------------------------------------------------|-------|-----------------------------------------------------------------------|
| News from the 40th European symposium on clinical pharmacy; 18-21 October 2011; Dublin                                                                                                                              | [120] | conference report                                                     |
| A university oncology department and a remote palliative care unit linked together by email and videoconferencing                                                                                                   | [121] | synchronous communication                                             |
| Dr Shipman's last legacy: E-surveillance of the medical profession                                                                                                                                                  | [122] | editorial                                                             |
| Mortality within 30 days of chemotherapy: A clinical governance benchmarking issue for oncology patients                                                                                                            | [123] | statistics on mortality, not palliative care as such                  |
| Evaluation of rebound ascites following discontinuation of bevacizumab in recurrent ovarian cancer                                                                                                                  | [124] | conference abstract                                                   |
| The mobile phone as a tool in improving cancer care in Nigeria                                                                                                                                                      | [125] | report on cancer care, not palliative care                            |
| Family medicine in 2018                                                                                                                                                                                             | [126] | no palliative care                                                    |
| Osteoradionecrosis of the Mandible: Treatment Outcomes and Factors Influencing the Progress of Osteoradionecrosis                                                                                                   | [127] | report on cancer treatment, not palliative care                       |
| Retrospective analysis of 191 patients with advanced hepatocellular carcinoma treated with transarterial chemoembolisation (TACE): Validation of the established and construction of an improved HCC-staging-system | [128] | report on cancer treatment, not palliative care                       |
| Home care for advanced cancer: Results and challenges                                                                                                                                                               | [129] | no eHealth intervention, no user needs                                |
| Palliative cancer patients and their families on the Internet: Motivation and impact                                                                                                                                | [130] | series of case studies, but unclear if cases are real or fictional    |
| Palliative care on the Net: an online survey of health care professionals                                                                                                                                           | [131] | general description of Internet usage, not related to palliative care |
| Analysis of the activity of a palliative care support team                                                                                                                                                          | [132] | no EHealth                                                            |
| Older rural Australian men with prostate cancer: Mapping their patterns of care                                                                                                                                     | [133] | conference abstract                                                   |
| Health behaviour interventions for cancer survivors: An overview of the evidence and contemporary Australian trials                                                                                                 | [134] | health education for cancer survivors                                 |
| Don't be afraid! What happens? EPR and decision making                                                                                                                                                              | [135] | conference abstract                                                   |
| Logistic aspects in emergency care of the elderly                                                                                                                                                                   | [136] | emergency care, not palliative                                        |
| The challenges of building and sustaining a pediatric neuro-oncology program in a developing country                                                                                                                | [137] | Pediatric                                                             |
| Implementation of the screening for Palliative Care Needs in the Emergency Department (SPEED) instrument in two emergency departments                                                                               | [138] | conference abstract                                                   |
| Nurse Practitioner led Palliative Care Program                                                                                                                                                                      | [139] | conference abstract                                                   |
| [Palliative care hospital units]                                                                                                                                                                                    | [140] | French                                                                |
| Using videoconferencing in palliative care                                                                                                                                                                          | [141] | synchronous communication                                             |

|                                                                                                                                                                             |       |                                                      |
|-----------------------------------------------------------------------------------------------------------------------------------------------------------------------------|-------|------------------------------------------------------|
| Videoconferencing and palliative care                                                                                                                                       | [142] | synchronous communication, no users' needs           |
| [Bretonneau mobile team, a bridge between the hospital and the community]                                                                                                   | [143] | French                                               |
| Combined interventional radiological therapy and radiotherapeutic treatment of patients with carcinomas of the extrahepatic biliary tract                                   | [144] | Oncological treatment evaluation, no palliative care |
| A coping and communication support intervention tailored to older patients diagnosed with late-stage cancer                                                                 | [145] | No ehealth                                           |
| Telemedicine across the ages                                                                                                                                                | [146] | report on symmetric communication, no users' needs   |
| What kind of requests do healthcare professionals make of a telephone out of hours specialist palliative care advice service? The experience of one hospice over a year [3] | [147] | Letter to editor                                     |
| Telephone consultation in palliative care in remote thar desert of India: 3 Years of experience                                                                             | [148] | conference abstract                                  |
| Telemedicine in community-based palliative care: evaluation of a videolink teleconference project                                                                           | [149] | synchronous communication, no users' needs           |
| In vivo dosimetry in electron beam teletherapy using electron paramagnetic resonance in L-alanine                                                                           | [150] | report on treatment method, not palliative care      |
| Out-of-hours palliative care provided by GP co-operatives: Availability, content and effect of transferred information                                                      | [151] | no ehealth intervention, no users' needs             |
| GI-cancer patients education: Status of cultural economical and social perceptions in developing nations                                                                    | [152] | Education on cancer, no palliative care itself       |
| MHWD Telepsychiatry Project 2004                                                                                                                                            | [153] | no palliative care                                   |
| Life after the women's health initiative: Evaluation of postmenopausal symptoms and use of alternative therapies after discontinuation of hormone therapy                   | [154] | no palliative care                                   |
| Telemedicine as a tool for evaluation of retinopathy of prematurity                                                                                                         | [155] | no palliative care                                   |
| Quality-of-care implications of improving physician communication through a Web-based tool                                                                                  | [156] | conference abstract                                  |
| Re-irradiation of recurrent and/or persistent squamous cell carcinoma of head and neck region                                                                               | [157] | treatment report                                     |
| Patient safety incidents in home hospice care: A qualitative study of interdisciplinary hospice team members                                                                | [158] | report on patient safety                             |
| Oncology patient-centered medical home and accountable cancer care                                                                                                          | [159] | no ehealth intervention, no users' needs             |
| [Mobile team for palliative care in Geneva]                                                                                                                                 | [160] | French                                               |



|                                                                                                                                                                                                                                   |       |                                                                        |
|-----------------------------------------------------------------------------------------------------------------------------------------------------------------------------------------------------------------------------------|-------|------------------------------------------------------------------------|
| Rationale, design, and implementation protocol of the Dutch clinical practice guideline pain in patients with cancer: a cluster randomised controlled trial with Short Message Service (SMS) and Interactive Voice Response (IVR) | [161] | conference abstract                                                    |
| Early palliative care for patients with metastatic non-small-cell lung cancer                                                                                                                                                     | [162] | no ehealth intervention, no users' needs                               |
| Longitudinal perceptions of prognosis and goals of therapy in patients with metastatic non-small-cell lung cancer: Results of a randomized study of early palliative care                                                         | [163] | no ehealth intervention, no users' needs                               |
| "You can't always get what you want" - Or can you?                                                                                                                                                                                | [164] | commentary                                                             |
| Screening for psychological distress in palliative care: performance of touch screen questionnaires compared with semistructured psychiatric interview.                                                                           | [165] | Validation of a touch-screen survey. Not effectiveness or users' needs |
| Duodenal stents are associated with more durable patency as compared to percutaneous endoscopic gastrojejunostomy in the palliation of malignant gastric outlet obstruction                                                       | [166] | no ehealth intervention, no users' needs                               |
| Self-expanding metal stents (SEMS) for patients with advanced Esophageal cancer in Malawi: An effective palliative treatment                                                                                                      | [167] | report on treatment, not palliative care as such                       |
| Marmara Medical Journal: From the editor                                                                                                                                                                                          | [168] | Editorial                                                              |
| [Cancer pain, a palliative care team approach]                                                                                                                                                                                    | [169] | French                                                                 |
| Tele-practice guidelines for the symptom management of children undergoing cancer treatment                                                                                                                                       | [170] | Pediatric                                                              |
| The effectiveness of palliative care education delivered by videoconferencing compared with face-to-face delivery.                                                                                                                | [171] | videoconferencing, no user needs                                       |
| The Long-term Efficacy of Pneumatic Dilatation and Heller Myotomy for the Treatment of Achalasia                                                                                                                                  | [172] | no palliative care                                                     |
| Home Oncology Medical Extension (H.O.M.E.) - an effective alternative to hospital care                                                                                                                                            | [173] | no eHealth intervention                                                |
| Multidisciplinary longitudinal approach to patients with high admission rates                                                                                                                                                     | [174] | conference abstract                                                    |
| Immediate or delayed palliative teleradiotherapy patients with advanced non small cell lung cancer?                                                                                                                               | [175] | palliative teleradiotherapy, not palliative care                       |
| Improving outcomes for people with progressive cancer: Interrupted time series trial of a needs assessment intervention                                                                                                           | [176] | no eHealth intervention, no users' information needs                   |
| Chronic heart failure: promoting quality of life                                                                                                                                                                                  | [177] | no EHealth                                                             |

|                                                                                                                                                    |       |                                                           |
|----------------------------------------------------------------------------------------------------------------------------------------------------|-------|-----------------------------------------------------------|
| Incorporating goals-of-care conversations into hospital admissions at a system-wide level: Policy and educational strategies (306)                 | [178] | conference abstract                                       |
| Reflexology for symptom relief in patients with cancer                                                                                             | [179] | no ehealth, no users' needs                               |
| Family discord and proxy decision makers' end-of-life treatment decisions                                                                          | [180] | evaluation of treatment decision (before palliative care) |
| Systems for the management of respiratory disease in primary care - an international series: United Kingdom                                        | [181] | report on health care system                              |
| Advance care planning among the oldest old                                                                                                         | [182] | no ehealth, no users' needs                               |
| Experiences of 24-hour advice line services: a framework for good practice and meeting NICE guidelines.                                            | [183] | sort of a whitepaper.                                     |
| Implementing a patient administration system                                                                                                       | [184] | report on administration system, no users's needs         |
| The elephant in the room: Negotiating meaningful advance care planning with patients, Families, and clinicians of diverse backgrounds and cultures | [185] | conference abstract                                       |

1. Abernethy A, Currow D. Patient self-reporting in palliative care using information technology: Yes, there is hope! *Palliative Med* 2011; 25(7).
2. Abernethy AP, Zhukovsky D. Pain and palliative care pharmacotherapy literature summaries and analyses. *J Pain Palliat Care Pharmacother* 2012; 26(1).
3. Adams D, Marx G. Daily life as an Australian medical oncologist. *J. Oncol. Pract* 2010; 6(3).
4. Albanese T, Radwany S, Taggart C, Chua DJ. Outpatient palliative care: Does it matter? *J. Pain Symptom Manage* 2012; 43(2).
5. Al-Hadad S, Al-Jadiry MF. Future planning to upgrade the pediatric oncology service in the Baghdad children welfare teaching hospital. *J. Pediatr. Hematol. Oncol* 2012; 34(SUPPL. 1).
6. Annual convention: Paramedics and emergency doctors of air rescue service met in Wurzburg. *Notarzt* 2008; 24(4):146.
7. Aoki N, Ohta S, Yamamoto H, Kikuchi N, Dunn K. Triangulation analysis of tele-palliative care implementation in a rural community area in Japan. *Telemedicine Journal and e-Health* 2006; 12(6):655–62.
8. Applebaum AJ, Lichtenthal WG, Pessin HA, Radomski JN, Simay Gokbayrak N, Katz AM et al. Factors associated with attrition from a randomized controlled trial of meaning-centered group psychotherapy for patients with advanced cancer. *Psycho-Oncology*.
9. Aubert L, Loureiro E. [The palliative care day hospital mobile team]. *Soins*; (758):43–4.
10. Baeza C. [Supporting caregivers in the palliative care unit (interview by Severine Coste)]. *Soins Gerontol*; (89):21.
11. Bailey FA, Ferguson L, Williams BR, Woodby LL, Redden DT, Durham RM et al. Palliative care intervention for choice and use of opioids in the last hours of life. *J. Gerontol. Ser. A Biol. Sci. Med. Sci* 2008; 63(9).
12. Bakitas M, Lyons KD, Hegel MT, Balan S, Brokaw FC, Seville J et al. Effects of a palliative care intervention on clinical outcomes in patients with advanced cancer: The project ENABLE II randomized controlled trial. *J. Am. Med. Assoc* 2009; 302(7).
13. Barallat Gimeno E, Palomar Naval C, Jimenez Vilchez A, Barbera Cortada J. Nursing diagnoses recorded in palliative care documentation. A systematic review: El registro de los diagnosticos enfermeros en cuidados paliativos. *Revision sistematica de la literatura castellana. Med. Paliativa* 2010; 17(4).
14. Barnett J, Syme A. Adopting and introducing new technology to improve patient care: a wedding of clinicians and informatics specialists. *Stud Health Technol Inform* 2009; 143:343–7.
15. Barton P, Jobanputra P, Wilson J, Bryan S, Burls A. The use of modelling to evaluate new drugs for patients with a chronic condition: The case of antibodies against tumour necrosis factor in rheumatoid arthritis. *Health Technol. Assess* 2004; 8(11).
16. Becker R. Online courses for nurses working in palliative care. *European Journal of Palliative Care* 2009; 16(2):94–7.
17. Belanger HG, Uomoto JM, Vanderploeg RD. The veterans health administration system of care for mild traumatic brain injury: Costs, benefits, and controversies. *J. Head Trauma Rehabil* 2009; 24(1).
18. Bensink M, Armfield N, Russell TG, Irving H, Wootton R. Paediatric palliative home care with Internet-based video-phones: lessons learnt. *J Telemed Telecare* 2004; 10 Suppl 1:10–3.
19. Bensink ME, Armfield NR, Pinkerton R, Irving H, Hallahan AR, Theodoros DG et al. Using videotelephony to support paediatric oncology-related palliative care in the home: from abandoned RCT to acceptability study. *Palliat Med* 2009; 23(3):228–37.

20. Bernacki RE, Ko DN, Higgins P, Whitlock SN, Cullinan A, Wilson R et al. Improving access to palliative care through an innovative quality improvement initiative: An opportunity for pay-for-performance. *J. Palliative Med* 2012; 15(2).
21. Bernard MF. [The helping relationship. Collaboration between the nurses of a palliative care mobile unit and the nurses of the clinical services]. *Soins Form Pedagog Encadr* 1998; (27):46–51.
22. Beuvin M. [Specific missions for the mobile palliative care support teams]. *Soins Gerontol* 2005; (55):22–4.
23. Blackstone K. A rapid response veteran affairs outpatient palliative care consult team (316-B). *J. Pain Symptom Manage* 2011; 41(1):198.
24. Blecharz P, Brandys P, Urbanski K, Reinfuss M, Patla A. Vaginal and pelvic recurrences in stage I and II endometrial carcinoma - Survival and prognostic factors. *European Journal of Gynaecological Oncology*; 32(4):403–7.
25. Blecharz P, Urbanski K, Reinfuss M, Szatkowski W, Jasiowka M. Radiotherapy and chemotherapy in patients with primary invasive vaginal carcinoma. *Wspolczesna Onkologia*; 14(4):265–9.
26. Borkan J, Eaton CB, Novillo-Ortiz D, Corte PR, Jadad AR. Renewing primary care: Lessons learned from the Spanish health care system. *Health Affairs*; 29(8):1432–41.
27. Bosserman LD. Oncology's transitional generation: Charting the way to integrated, efficient, and cost-effective delivery systems. *Community Oncol* 2012; 9(1):2.
28. Bourgeois Y, Jacques C, Khelifa A. [Development of palliative care in the Vaud canton. 3 mobile teams are in place]. *Krankenpfl Soins Infirm* 2003; 96(5):52–4.
29. Bradford N, Herbert A, Walker R, Pedersen LA, Hallahan A, Irving H et al. Home telemedicine for paediatric palliative care. In: *Studies in Health Technology and Informatics*. p. 10–9 .
30. Bruera E. Studying the effectiveness of palliative care [1]. *JAMA - Journal of the American Medical Association* 2008; 300(9):1022.
31. Cameron PA, Schull MJ, Cooke MW. A framework for measuring quality in the emergency department. *Emerg. Med. J* 2011; 28(9).
32. Campbell C, Harper A, Elliker M. Introducing 'Palcall': an innovative out-of-hours telephone service led by hospice nurses. *Int J Palliat Nurs* 2005; 11(11):586–90. PMID:16471046.
33. Campbell M, Walch J, Sanna-Gouin K, Colomba S. Translating research into practice: Reducing gastrostomy tube placement in advanced dementia patients (711). *J. Pain Symptom Manage* 2011; 41(1):278.
34. Casey S, Hamalainen T, Di Monte B, Drybrough K. A pediatric oncology nursing outreach program. *Pediatric Blood and Cancer* 2009; 53(5):891.
35. Choy PYG, Koea J, McCall J, Holden A, Osbourne M. The role of radiofrequency ablation in the treatment of primary and metastatic tumours of the liver: Initial lessons learned. *New Zealand Med. J* 2002; 115(1159).
36. Coenen A, Kim TY. Development of terminology subsets using ICNP(registered trademark). *Int. J. Med. Informatics* 2010; 79(7).
37. Combes M. [Activities of a nurse of a palliative mobile unit]. *Rev Infirm* 1996; (1):31–8.
38. Cross R, Steury R, Randall A, Fuska M, Sable C. Single-ventricle palliation for high-risk neonates: Examining the feasibility of an automated home monitoring system after stage i palliation. *Future Cardiol* 2012; 8(2).

39. D'Angelo D, Mastroianni C, Casale G, Carbonara L, Vellone E, Alvaro R et al. Transitions in care during a palliative care program: Distribution and associated factors. *European Journal of Cancer*; 47:S318.
40. d'Herouville D, Combes M, Manenti G, Gandiol C, Cereda C. [Palliative care by a mobile team: objectives and missions, qualities and difficulties]. *Rev Infirm* 1996; (1):26–30.
41. Dabbagh O, Parker WA, Philpot MA, Keegan MB, Bosanquet JP. Patients at highest risk for venous thromboembolism are not receiving specific discharge instructions warning for signs and symptoms of VTE: A double setback. *J. Thromb. Haemost* 2009; 7(S2):770.
42. Dabrowski A, Skoczylas T, Zinkiewicz K, Bury J, Borkowski A, Wallner G. Palliative treatment of esophageal carcinoma. *Polski Merkuriusz Lekarski* 2005; 19(114):804–7.
43. Davila A, Garza M, Lee S, Ross J, Sanchez-Reilly S. Effectiveness of a geriatric palliative care consult on pain management and advance directives among older adults. *J. Pain Symptom Manage* 2010; 39(2):395.
44. Davis MR, Smith CP, Phillips SG, Semones JG. Making an impact on 30 day heart failure readmissions: A comprehensive and collaborative effort begins. *Heart Lung J. Acute Crit. Care* 2011; 40(4):376.
45. Dixon W, Danielson B, Pituskin E, Fairchild A, Ghosh S. The feasibility of telephone follow-up led by a radiation therapist: Experience in a multidisciplinary bone metastases clinic. *Journal of Medical Imaging and Radiation Sciences*; 41(4):175–9.
46. Dixon S, Chung D, Anderson EM, Cunningham C, Anthony S, Bratby M et al. Colorectal stenting in large bowel obstruction: Our experience. *Cardiovasc. Intervent. Radiol* 2011; 34:493.
47. Dolovich L. Ontario pharmacists practicing in family health teams and the patient-centered medical home. *Ann. Pharmacother* 2012; 46(4).
48. Donnem T, Ervik B, Magnussen K, Andersen S, Pastow D, Andreassen S et al. Bridging the distance: a prospective tele-oncology study in Northern Norway. *Supportive Care in Cancer*:1–7.
49. Downing J, Kawuma E. The impact of a modular HIV/AIDS palliative care education programme in rural Uganda. *Int J Palliat Nurs* 2008; 14(11):560–8.
50. Duursma F, Schers HJ, Vissers KC, Hasselaar J. Study protocol: Optimization of complex palliative care at home via telemedicine. A cluster randomized controlled trial. *BMC Palliative Care*; 10.
51. Elias C. [Mobile team of palliative care. Role of the nurse in relation to hospital nurses]. *Soins* 1996; (606):46–7.
52. Evans R, Stone D, Elwyn G. Organizing palliative care for rural populations: A systematic review of the evidence. *Fam. Pract* 2003; 20(3).
53. Foley G, Timonen V, Hardiman O. Patients' perceptions of services and preferences for care in amyotrophic lateral sclerosis: A review. *Amyotrophic Lateral Sclerosis*; 13(1):11–24.
54. Forsberg C, Rundstrom C, Randen M, Dahlin Y, Veidemann E, Barkfjord S. Ambulatory oncology consulting team: A bridge between the oncology department and staff in the community health care in the county of Stockholm, Sweden. *Supportive Care in Cancer*; 18:S87.
55. French J. *Journal of Medical Imaging and Radiation Sciences: Message from the Editor. Journal of Medical Imaging and Radiation Sciences*; 41(4):171–4.
56. Frithsen IL, Simpson WM. Recognition and management of acute medication poisoning. *Am. Fam. Phys* 2010; 81(3).
57. Furioli J, Le Guehennec J, Desouches MM, Dureuil L, Thebault J. [Lois or the end of life of a child suffering from cancer]. *Soins Pueric*; (260):21–3.

58. Garbutt JM, Banister C, Spitznagel E, Piccirillo JF. Amoxicillin for acute rhinosinusitis: A randomized controlled trial. *JAMA - Journal of the American Medical Association*; 307(7):685–92.
59. Ghiglione B, Cholet V, Calcagno B, Llopet C. [Mobile palliative and supportive care unit]. *Soins*; (754 Suppl):S12-3.
60. Gholiha A, Fransson G, Furst CJ, Heedman P, Lundstrom S, Axelsson B. Stora luckor i journaler vid vard i livets slutskede. *Lakartidningen* 2011; 108(16).
61. Gibelli G, Gibelli B, Nani F. Thyroid cancer: possible role of telemedicine. *Acta otorhinolaryngologica Italica : organo ufficiale della Societ  italiana di otorinolaringologia e chirurgia cervico-facciale* 2008; 28(6):281–6.
62. Giesen P, Veldhoven C, Vlaar N, Borghuis M, Koetsenruijter J, Verheggen S. Patients' opinion of weekend cover by palliative care general practitioners. *Huisarts en Wetenschap*; 54(12):646–9.
63. Goebel J, Ahluwalia S, Chong K, Lorenz KA, Walling A. Why, How, What, and "So What!" Developing Clinical Informatics Tools for Determined Skeptics. *J. Pain Symptom Manage* 2012; 43(2):403.
64. Gott M, Ward S, Gardiner C, Cobb M, Ingleton C. A narrative literature review of the evidence regarding the economic impact of avoidable hospitalizations amongst palliative care patients in the UK. *Prog. Palliative Care* 2011; 19(6).
65. Graham RJ. Specialty services for children with special health care needs: Supplement not supplant the medical home. *Archives of Disease in Childhood* 2008; 93(1):2–4.
66. Grande GE, McKerral A, Todd CJ. Which cancer patients are referred to hospital at home for palliative care? *Palliative Med* 2002; 16(2).
67. Gray BH. In this issue. *Milbank Q* 2011; 89(3).
68. Gregorio SW, Gustin J, Collier K, Taylor R. Supportive care assessment: Patient preferences for disclosure of palliative care information. *J. Pain Symptom Manage* 2010; 39(2).
69. Gregory A, Todd J, Wanklyn S. Out-of-hours prescribing: A survey of current practice in the UK. *Palliative Medicine* 2007; 21(7):575–80.
70. Hansen PR, Ma JD, Atayee RS. Preliminary analysis of midlevel practitioners on pain and health-related quality of life and function for a palliative care service at a comprehensive cancer center. *J. Palliative Med* 2012; 15(4).
71. Hanson LC, Schenck AP, Rokoske FS, Abernethy AP, Kutner JS, Spence C et al. Hospices' Preparation and Practices for Quality Measurement. *J. Pain Symptom Manage* 2010; 39(1).
72. Hartz T, Bruntrup R, Uckert F. Technical data evaluation of a palliative care web-based documentation system. In: *Studies in Health Technology and Informatics : Stud. Health Technol. Informatics*; 2011 .
73. Hebert MA, Paquin MJ, Whitten L, Cai P. Analysis of the suitability of 'video-visits' for palliative home care: implications for practice. *Journal of telemedicine and telecare* 2007; 13(2):74–8.
74. Hesse BW, Suls JM. Informatics-enabled behavioral medicine in oncology. *Cancer J* 2011; 17(4).
75. Hoeksema L, Montagnini M, Zaleon C. Improving medication reconciliation in an outpatient palliative medicine clinic: A quality improvement study. *J. Pain Symptom Manage* 2012; 43(2).
76. Holme J, Bianchi S, Clifton I, De-Soyza A, Edenborough F, Peckham D et al. Expert consensus on diagnostic criteria and tertiary service requirements for bronchiectasis. *Thorax*; 66:A50.
77. Hoving C, Visser A, Mullen PD, van den Borne B. A history of patient education by health professionals in Europe and North America: from authority to shared decision making education. *Patient Educ Couns*; 78(3):275–81.

78. Hsu C, Chen H, Lee S, Tsou M. Knowledge and Attitude toward Hospice Palliative Care among Community-Dwelling Aged Taiwanese-Analysis of Related Factors. *Int. J. Gerontol* 2012.
79. Huffman JL. Surgical palliative care in Haiti. *Surg Clin North Am*; 91(2):445-57, x.
80. Irving H, Bensink M, Herbert A, Bradford N. Videotelephony: An innovative mode of palliative care service delivery in regional and remote areas. *Pediatric Blood and Cancer*; 55(5):948.
81. Jaarsma T, Stromberg A, Geest S de, Fridlund B, Heikkila J, Martensson J et al. Heart failure management programmes in Europe. *European Journal of Cardiovascular Nursing* 2006; 5(3):197–205.
82. Jadad AR, Bender JL. Using the internet to improve the study and management of pain: Could the health system meet our expectations? *Reviews in Analgesia* 2006; 9(1):21–9.
83. Jaenicke C, Wagner J, Florea V. An approach for incorporating advanced care planning into heart failure specialty care. *J. Card. Fail* 2009; 15(6):S121.
84. Jensen CA, Greven KM. Pelvic reirradiation for recurrent or new primary gynecologic malignancies. *Brachytherapy*; 9:S51.
85. Johnston B. UK telehealth initiatives in palliative care: A review. *International Journal of Palliative Nursing*; 17(6):301–8.
86. Johnston BM. Using technology in palliative care - A reality. *European Journal of Cancer*; 47:S5.
87. Kaser DJ, Missmer SA, Berry KF, Laufer MR. Use of Norethindrone Acetate Alone for Postoperative Suppression of Endometriosis Symptoms. *J. Pediatr. Adolesc. Gynecol* 2012; 25(2).
88. Keeney C, Head B, Pfeifer M. From skype to smart phones: Uses and limits of telehealth in palliative care. *Journal of Pain and Symptom Management*; 43(2):392–3.
89. Kendall-Carpenter E. Empowering local people to run a mobile palliative care service. *Nurs N Z*; 17(4):26–7.
90. Kirch DG. Who says medical education hasn't changed? *Medgenmed Medscape Gen. Med* 2007; 9(3).
91. Knapp C. e-Health in pediatric palliative care. *American Journal of Hospice and Palliative Medicine*; 27(1):66–73.
92. Knapp C, Madden V, Marcu M, Wang H, Curtis C, Sloyer P et al. Information seeking behaviors of parents whose children have life-threatening illnesses. *Pediatric Blood and Cancer*; 56(5):805–11.
93. Kolodziej MA. Does evidence-based medicine really reduce costs? *Oncology (USA)* 2011; 25(3).
94. Kuin A, Deliens L, van Zuylen L, Courtens AM, Vernooij-Dassen MJFJ, van der Linden B et al. Spiritual issues in palliative care consultations in the Netherlands. *Palliative Medicine* 2006; 20(6):585–92.
95. Laila M, Rialle V, Nicolas L, Duguay C, Franco A. Videophones for the delivery of home healthcare in oncology. In: *Studies in Health Technology and Informatics*. p. 39–44 .
96. Lassauniere JM. [Palliative care mobile team at a Parisian university hospital]. *Rev Med Brux* 2002; 23(1):27–30.
97. Laval G, Villard ML, Comandini F. [What is expected of psychologists in palliative care mobile teams? Their role and missions]. *Presse Med* 2003; 32(15):677–82.
98. Lee KM, Shin SJ, Hwang JC, Cheong JY, Yoo BM, Lee KJ et al. Comparison of uncovered stent with covered stent for treatment of malignant colorectal obstructionA figure is presented. *Gastrointestinal Endoscopy* 2007; 66(5):931–6.

99. Lepeleire J, Leirman W. Poor Effect of Family Practice Physician Training at the Organizational Level in Long-Term Care Facilities in Flanders, Belgium. *J. Am. Med. Dir. Assoc* 2006; 7(7):470.
100. Levetown M. Communicating with children and families: From everyday interactions to skill in conveying distressing information. *Pediatrics* 2008; 121(5):e1441-e1460.
101. Livote E, Chang V, Cortez T, Heyding R, Luhrs C, Penrod J et al. Feasibility of symptom and quality-of-life (QOL) assessment in a VA network-based palliative care (PC) program. *J. Pain Symptom Manage* 2010; 39(2):386.
102. Lloyd-Williams M. Out-of-hours palliative care advice line. *Br J Gen Pract* 2001; 51(469):677.
103. Lopez MA, Latiesas XS, Arnalot PF, Bassols ML, Castillejo AR, Galan JL et al. Use of radiation treatment units in breast cancer. Changes in the last 15 years. *Clinical and Translational Oncology* 2008; 10(1):47–51.
104. Lundstrom S. Is it reliable to use cellular phones for symptom assessment in palliative care? Report on a study in patients with advanced cancer. *Journal of Palliative Medicine* 2009; 12(12):1087.
105. Lynch J, Weaver L, Hall P, Langlois S, Stunt M, Schroder C et al. Using telehealth technology to support CME in end-of-life care for community physicians in Ontario. *Telemed J E Health* 2004; 10(1):103–7.
106. Madhavan S, Sanders AE, Chou WYS, Shuster A, Boone KW, Dente MA et al. Pediatric palliative care and eHealth: Opportunities for patient-centered care. *American Journal of Preventive Medicine*; 40(5 SUPPL. 2):S208-S216.
107. Mahoney EJ, Biffi WL, Cioffi WG. Analytic review: Mass-casualty incidents: How does an ICU prepare? *Journal of Intensive Care Medicine* 2008; 23(4):219–35.
108. Majoni W. Telemedicine is crucial for improving access to specialist renal care and management of renal disease in remote/rural locations. *Internal Medicine Journal*; 41:11.
109. Martinsson L, Heedman P, Lundstrom S, Fransson G, Axelsson B. Validation study of an end-of-life questionnaire from the Swedish Register of Palliative Care. *Acta Oncol* 2011; 50(5).
110. McCullough HK, Bain RM, Clark HP, Requarth JA. The radiologist as a palliative care subspecialist: Providing symptom relief when cure is not possible. *Am. J. Roentgenol* 2011; 196(2).
111. Micheli A, Sanz N, Mwangi-Powell F, Coleman MP, Neal C, Ullrich A et al. International collaborations in cancer control and the Third International Cancer Control Congress. *Tumori* 2009; 95(5):579–96.
112. Mitchell AJ. New developments in the detection and treatment of depression in cancer settings. *Progress in Neurology and Psychiatry*; 15(5):12–20.
113. Miyazaki M, Stuart M, Liu L, Tell S, Stewart M. Use of ISDN video-phones for clients receiving palliative and antenatal home care. *Journal of telemedicine and telecare* 2003; 9(2):72–7.
114. Morgan GJ, Craig B, Grant B, Sands A, Doherty N, Casey F. Home videoconferencing for patients with severe congenital heart disease following discharge. *Congenital Heart Disease* 2008; 3(5):317–24.
115. Morrison D. Psychosocial supportive care: An effective and integrated team approach. *Psycho-Oncology* 2009; 18:S5-S6.
116. Murphy DR, Laxmisan A, Reis BA, Thomas EJ, Singh H. Using electronic triggers to identify patients at risk for diagnostic delays in prostate cancer. *J. Gen. Intern. Med* 2011; 26.
117. Nair MK, Varghese C, Kumar A, Manoj G, Sudhamony S. Telemedicine in radiation oncology: Challenges and opportunities. *Journal International Medical Sciences Academy* 2005; 18(1):39–41.



118. Nappa U, Lindqvist O, Rasmussen BH, Axelsson B. Palliative chemotherapy during the last month of life. *Ann. Oncol* 2011; 22(11).
119. Nazarian LF. Entering our fourth decade. *Pediatrics in Review* 2009; 30(1):3–4.
120. News from the 40th European symposium on clinical pharmacy; 18-21 October 2011; Dublin. *Drugs Ther. Perspect* 2012; 28(1).
121. Norum J, Jordhoy MS. A university oncology department and a remote palliative care unit linked together by email and videoconferencing. *Journal of telemedicine and telecare* 2006; 12(2):92–6.
122. Nutt DJ. Dr Shipman's last legacy: E-surveillance of the medical profession. *J. Psychopharmacol* 2005; 19(5):441.
123. O'Brien MER, Borthwick A, Rigg A, Leary A, Assersohn L, Last K et al. Mortality within 30 days of chemotherapy: A clinical governance benchmarking issue for oncology patients. *Br. J. Cancer* 2006; 95(12).
124. O'Cearbhaill RE, Zhou Q, Iasonos A, Spriggs D, Aghajanian C, Sabbatini P. Evaluation of rebound ascites following discontinuation of bevacizumab in recurrent ovarian cancer. *Ann. Oncol* 2010; 21:viii309.
125. Odigie VI, Yusufu LMD, Dawotola DA, Ejagwulu F, Abur P, Mai A et al. The mobile phone as a tool in improving cancer care in Nigeria. *Psycho-Oncology* 2012; 21(3).
126. Ogle KD, Boule R, Boyd RJ, Brown G, Cervin C, Dawes M et al. Family medicine in 2018: La médecine familiale en 2018. *Can. Fam. Phys* 2010; 56(4).
127. Oh HK, Chambers MS, Martin JW, Lim HJ, Park HJ. Osteoradionecrosis of the Mandible: Treatment Outcomes and Factors Influencing the Progress of Osteoradionecrosis. *Journal of Oral and Maxillofacial Surgery* 2009; 67(7):1378–86.
128. Op Den Winkel M, Nagel D, Op Den Winkel P, Sappl J, Straub G, Lamerz R et al. Retrospective analysis of 191 patients with advanced hepatocellular carcinoma treated with transarterial chemoembolisation (TACE): Validation of the established and construction of an improved HCC-staging-system. *J. Hepatol* 2011; 54:S397.
129. Pannuti F, Tanneberger S. Home care for advanced cancer: Results and challenges. *Archive of Oncology*; 18(3):79–83.
130. Pereira J, Bruera E, Macmillan K, Kavanagh S. Palliative cancer patients and their families on the Internet: motivation and impact. *J Palliat Care* 2000; 16(4):13–9. PMID:11965929.
131. Pereira J, Bruera E, Quan H. Palliative care on the net: an online survey of health care professionals. *J Palliat Care* 2001; 17(1):41–5. PMID:11324184.
132. Perez Durillo FT, Gallego Montalban JA, Jaen Castillo P. Analysis of the activity of a palliative care support team. *Medicina Paliativa*.
133. Phillips JL, West PA, Harrington G, Gorzyska K, Shakespeare T. Older rural Australian men with prostate cancer: Mapping their patterns of care. *Asia-Pac. J. Clin. Oncol* 2010; 6:179.
134. Pollard A, Eakin E, Vardy J, Hawkes A. Health behaviour interventions for cancer survivors: An overview of the evidence and contemporary Australian trials. *Cancer Forum* 2009; 33(3):182–6.
135. Porta E, Manenti E, Rizzi B, Luca B, Cattaneo D. “I’m Afraid! What Happens?” EPR and Decision Making. *Palliative Med* 2010; 24(4):S89.
136. Pruckner S, Martin S, Kleinberger T, Madler C, Luiz T. Logistic aspects in emergency care of the elderly. *Notfall und Rettungsmedizin*; 14(3):197–201.
137. Qaddoumi I. The challenges of building and sustaining a pediatric neuro-oncology program in a developing country. *Neuro-Oncology* 2009; 11(6):900.

138. Quest TE, Gisondi MA, Engel KG, Emanuel LL, Goldstein CE. Implementation of the screening for Palliative Care Needs in the Emergency Department (SPEED) instrument in two emergency departments. *Acad. Emerg. Med* 2011; 18(5):S194.
139. Randle M. Nurse Practitioner led Palliative Care Program. *J. Palliative Med* 2011; 14(3):A4.
140. Rautureau P. [Palliative care hospital units]. *Rev Infirm* 2008; (143):32–3.
141. Regnard C. Using videoconferencing in palliative care. *Palliat Med* 2000; 14(6):519–28.
142. Regnard C. Videoconferencing and palliative care. *European Journal of Palliative Care* 2000; 7(5):168–71.
143. Remy I. [Bretonneau mobile team, a bridge between the hospital and the community]. *Soins Gerontol* 2007; (64):35–8.
144. Riedmann E, Pichler L. Combined interventional radiological therapy and radiotherapeutic treatment of patients with carcinomas of the extrahepatic biliary tract. *Journal fuer Gastroenterologische und Hepatologische Erkrankungen* 2005; 3(2):31–5.
145. Rose JH, Radziewicz R, Bowman KF, O'Toole EE. A coping and communication support intervention tailored to older patients diagnosed with late-stage cancer. *Clinical Interventions in Aging* 2008; 3(1):77–95.
146. Sabesan SS, Nel P, Varma SC. Telemedicine across the ages. *Medical Journal of Australia* 2009; 190(12):719.
147. Salt S. What kind of requests do healthcare professionals make of a telephone out of hours specialist palliative care advice service? The experience of one hospice over a year [3]. *Palliative Medicine* 2007; 21(1):61–2.
148. Sanchetee S, Sanchetee S. Telephone consultation in palliative care in remote thar desert of India: 3 Years of experience. *Supportive Care in Cancer* 2010; 18(3 Supplement):S176.
149. Saysell E, Routley C. Telemedicine in community-based palliative care: evaluation of a videolink teleconference project. *International Journal of Palliative Nursing* 2003; 9(11):489–95.
150. Schultka K, Ciesielski B, Wysocka B. In vivo dosimetry in electron beam teletherapy using electron paramagnetic resonance in L-alanine. *Nowotwory* 2005; 55(6):448–51.
151. Schweitzer BPM, Blankenstein N, Deliens L, van der Horst H. Out-of-hours palliative care provided by GP co-operatives: Availability, content and effect of transferred information. *BMC Palliative Care* 2009; 8.
152. Shankpal P, Vaishali S. GI-cancer patients education: Status of cultural economical and social perceptions in developing nations. *Annals of Oncology*; 21:vi45.
153. Shearer R, Macaulay S. MHWD Telepsychiatry Project 2004. *Healthc. Rev. Online* 2005; 9(2).
154. Shrader SP, Ragucci KR. Life after the women's health initiative: Evaluation of postmenopausal symptoms and use of alternative therapies after discontinuation of hormone therapy. *Pharmacotherapy* 2006; 26(10).
155. Silva RA, Moshfeghi DM. Telemedicine as a tool for evaluation of retinopathy of prematurity. *International Ophthalmology Clinics*; 51(1):33–48.
156. Silva AP, Bertoni VD, Mulvey TM, Sampaio C. Quality-of-care implications of improving physician communication through a Web-based tool (Teamwork). *ASCO Meeting Abstracts* 2012; 30(34\_suppl):310.
157. Singh K, Shekhar S, Baruah JD, Bahadur AK, Gulati A, Rathi AK. Re-irradiation of recurrent and/or persistent squamous cell carcinoma of head and neck region. *Radiotherapy and Oncology*; 99:S333.

158. Smucker D, Regan S. Patient safety incidents in home hospice care: A qualitative study of interdisciplinary hospice team members. *Journal of Pain and Symptom Management*; 43(2):462–3.
159. Sprandio JD. Oncology patient-centered medical home and accountable cancer care. *Community Oncol* 2010; 7(12).
160. Steiner N, Luchsinger V. [Mobile team for palliative care in Geneva]. *Rev Med Suisse Romande* 1997; 117(3):249–53.
161. te Boveldt N, Engels Y, Besse K, Vissers K, Vernooij-Dassen M. Rationale, design, and implementation protocol of the Dutch clinical practice guideline pain in patients with cancer: a cluster randomised controlled trial with Short Message Service (SMS) and Interactive Voice Response (IVR). *Implement Sci* 2011; 6:126. PMID:22142327.
162. Temel JS, Greer JA, Muzikansky A, Gallagher ER, Admane S, Jackson VA et al. Early palliative care for patients with metastatic non-small-cell lung cancer. *New Engl. J. Med* 2010; 363(8).
163. Temel JS, Greer JA, Admane S, Gallagher ER, Jackson VA, Lynch TJ et al. Longitudinal perceptions of prognosis and goals of therapy in patients with metastatic non-small-cell lung cancer: Results of a randomized study of early palliative care. *J. Clin. Oncol* 2011; 29(17).
164. Teno JM, Dosa D. "You can't always get what you want" - Or can you? *CMAJ* 2006; 174(5).
165. Thekkumpurath P, Venkateswaran C, Kumar M, Newsham A, Bennett MI. Screening for psychological distress in palliative care: performance of touch screen questionnaires compared with semistructured psychiatric interview. *J Pain Symptom Manage* 2009; 38(4):597–605. PMID:19692204.
166. Thlick JC, Strand D, Patrie JT, Gaidhane M, Kahaleh M, Wang AY. Duodenal stents are associated with more durable patency as compared to percutaneous endoscopic gastrojejunostomy in the palliation of malignant gastric outlet obstruction. *Gastrointest. Endosc* 2011; 73(4):AB242.
167. Thumbs A, Borgstein E, Vigna L, Kingham TP, Kushner AL, Hellberg K et al. Self-expanding metal stents (SEMS) for patients with advanced Esophageal cancer in Malawi: An effective palliative treatment. *Journal of Surgical Oncology*; 105(4):410–4.
168. Tozun N. Marmara Medical Journal: From the editor. *Marmara Medical Journal* 2003; 16(2):77–8.
169. Triol I. [Cancer pain, a palliative care team approach]. *Rev Infirm* 2008; (140):33–5.
170. Tsimicalis A, Courcy MJ de, Di Monte B, Armstrong C, Bambury P, Constantin J et al. Tele-practice guidelines for the symptom management of children undergoing cancer treatment. *Pediatric Blood and Cancer*; 57(4):541–8.
171. van Boxell P, Anderson K, Regnard C. The effectiveness of palliative care education delivered by videoconferencing compared with face-to-face delivery. *Palliat Med* 2003; 17(4):344–58. PMID:12822852.
172. Vela MF, Richter JE, Khandwala F, Blackstone EH, Wachsberger D, Baker ME et al. The Long-term Efficacy of Pneumatic Dilatation and Heller Myotomy for the Treatment of Achalasia. *Clinical Gastroenterology and Hepatology* 2006; 4(5):580–7.
173. Vinciguerra V. Home Oncology Medical Extension (H.O.M.E.) - an effective alternative to hospital care. *Prog Clin Biol Res* 1983; 120:319–26.
174. Virapongse A, Sullivan E, Ree J, Chun A, Daisley W, Friedrich M et al. Multidisciplinary longitudinal approach to patients with high admission rates. *J. Hosp. Med* 2012; 7:S136.
175. Walasek T, Reinfuss M, Blecharz P, Jakubowicz J, Skotnicki P, Pluta E. Immediate or delayed palliative teloradiotherapy patients with advanced non small cell lung cancer? *Nowotwory* 2009; 59(4):283–6.

176. Waller A, Girgis A, Johnson C, Lecathelinais C, Sibbritt D, Forstner D et al. Improving outcomes for people with progressive cancer: Interrupted time series trial of a needs assessment intervention. *Journal of Pain and Symptom Management*; 43(3):569–81.
177. While A, Kiek F. Chronic heart failure: promoting quality of life. *British journal of community nursing* 2009; 14(2):54–9.
178. White J, Fromme E. Incorporating goals-of-care conversations into hospital admissions at a system-wide level: Policy and educational strategies (306). *J. Pain Symptom Manage* 2011; 41(1):183.
179. Wilkinson S, Lockhart K, Gambles M, Storey L. Reflexology for symptom relief in patients with cancer. *Cancer Nurs* 2008; 31(5).
180. Winter L, Parks SM. Family discord and proxy decision makers' end-of-life treatment decisions. *Journal of Palliative Medicine* 2008; 11(8):1109–14.
181. Worth A, Pinnock H, Fletcher M, Hoskins G, Levy M, Sheikh A. Systems for the management of respiratory disease in primary care - an international series: United Kingdom. *Primary Care Respiratory Journal*; 20(1):23–32.
182. Wu P, Lorenz KA, Chodosh J. Advance care planning among the oldest old. *J. Palliative Med* 2008; 11(2).
183. Yardley SJ, Codling J, Roberts D, O'Donnell V, Taylor S. Experiences of 24-hour advice line services: a framework for good practice and meeting NICE guidelines. *Int J Palliat Nurs* 2009; 15(6):266, 268-71. PMID:19568212.
184. Young G. Implementing a patient administration system. *European Journal of Palliative Care* 2000; 7(1):26–8.
185. Zhukovsky D, Glajchen M, Robin Lustbader D. The elephant in the room: Negotiating meaningful advance care planning with patients, Families, and clinicians of diverse backgrounds and cultures. *J. Pain Symptom Manage* 2012; 43(2).
